# Supplementary material for: A Pair of Prognostic Biomarkers in Triple-Negative Breast Cancer: KLK10 and KLK11 mRNA Expression
Source: MDPI journal article supplement (doi:10.3390/life12101517), 2022-09-28
Supplement: s1 [file s1]

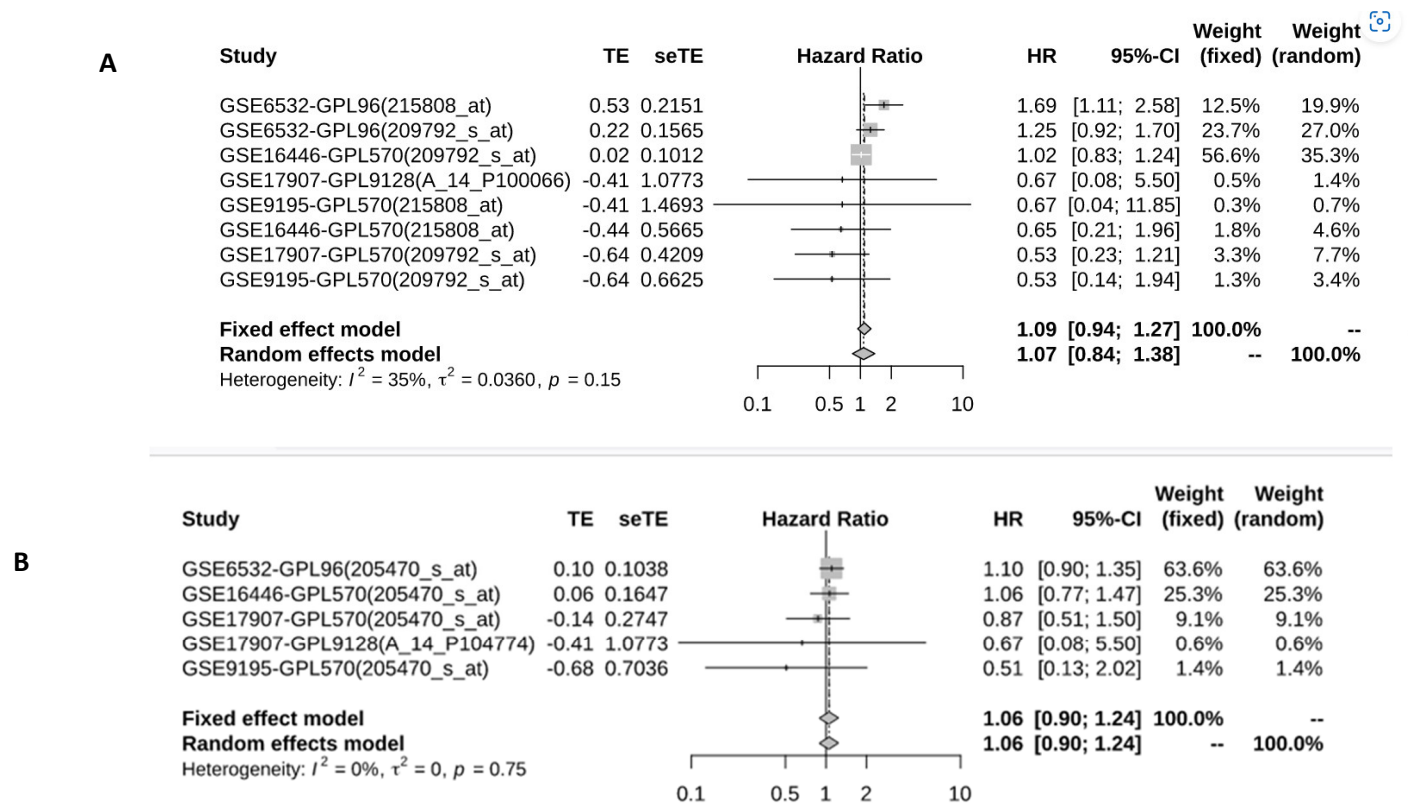

**Figure S1.** Forest plot of the impact of KLK10 (A) and KLK11 (B) expression on the hazard ratio of progression-free survival in breast cancer. Depicted are several publicly available datasets. The analysis was performed via the GENT2 platform.

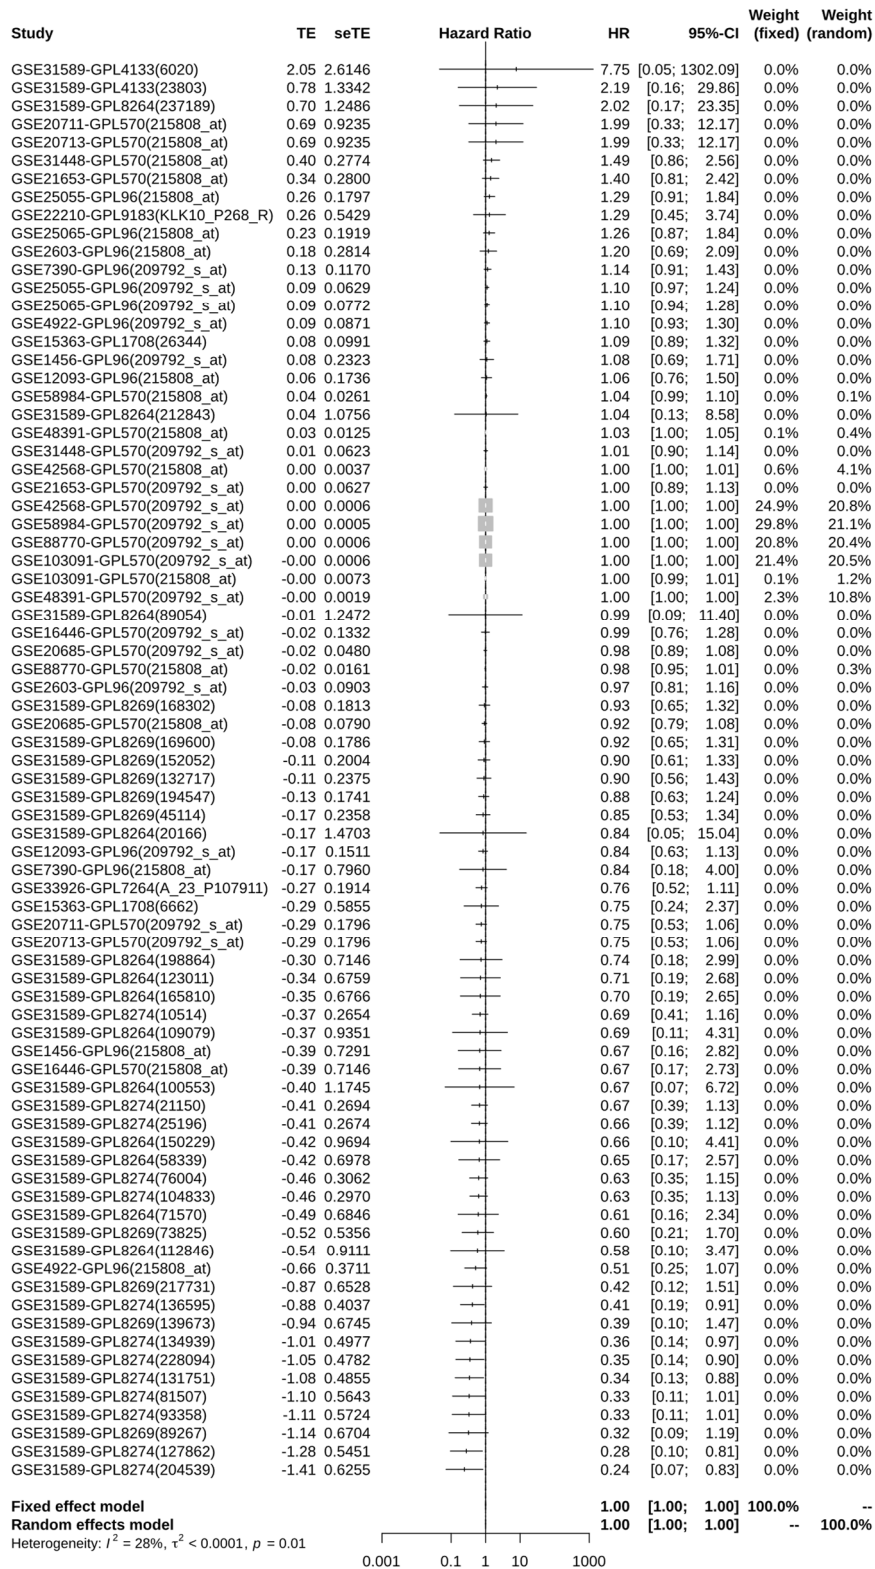

**Figure S2.** Forest plot of the impact of KLK10 expression on the hazard ratio of overall survival in breast cancer. Depicted are several publicly available datasets. The analysis was performed via the GENT2 platform.

| Study                                                        | TE    | seTE   | HR   | 95%-CI            | Weight<br>(fixed) | Weight<br>(random) |
|--------------------------------------------------------------|-------|--------|------|-------------------|-------------------|--------------------|
| GSE4922-GPL96(205470_s_at)                                   | 0.05  | 0.0789 | 1.05 | [0.90; 1.23]      | 0.0%              | 0.0%               |
| GSE33926-GPL7264(A_23_P101500)                               | 0.02  | 0.2739 | 1.02 | [0.60; 1.75]      | 0.0%              | 0.0%               |
| GSE31448-GPL570(205470_s_at)                                 | 0.00  | 0.0842 | 1.00 | [0.85; 1.18]      | 0.0%              | 0.0%               |
| GSE58984-GPL570(205470_s_at)                                 | 0.00  | 0.0010 | 1.00 | [1.00; 1.00]      | 2.4%              | 13.3%              |
| GSE88770-GPL570(205470_s_at)                                 | -0.00 | 0.0002 | 1.00 | [1.00; 1.00]      | 66.8%             | 26.3%              |
| GSE42568-GPL570(205470_s_at)                                 | -0.00 | 0.0003 | 1.00 | [1.00; 1.00]      | 20.6%             | 24.3%              |
| GSE48391-GPL570(205470_s_at)                                 | -0.00 | 0.0007 | 1.00 | [1.00; 1.00]      | 5.8%              | 19.0%              |
| GSE103091-GPL570(205470_s_at)                                | -0.00 | 0.0008 | 1.00 | [1.00; 1.00]      | 4.3%              | 17.2%              |
| GSE16446-GPL570(205470_s_at)                                 | -0.00 | 0.2367 | 1.00 | [0.63; 1.59]      | 0.0%              | 0.0%               |
| GSE21653-GPL570(205470_s_at)                                 | -0.01 | 0.0850 | 0.99 | [0.84; 1.17]      | 0.0%              | 0.0%               |
| GSE12093-GPL96(205470_s_at)                                  | -0.03 | 0.0977 | 0.97 | [0.80; 1.18]      | 0.0%              | 0.0%               |
| GSE7390-GPL96(205470_s_at)                                   | -0.03 | 0.1219 | 0.97 | [0.76; 1.23]      | 0.0%              | 0.0%               |
| GSE20685-GPL570(205470_s_at)                                 | -0.06 | 0.0615 | 0.94 | [0.84; 1.06]      | 0.0%              | 0.0%               |
| GSE25065-GPL96(205470_s_at)                                  | -0.09 | 0.0927 | 0.91 | [0.76; 1.09]      | 0.0%              | 0.0%               |
| GSE2603-GPL96(205470_s_at)                                   | -0.10 | 0.1154 | 0.90 | [0.72; 1.13]      | 0.0%              | 0.0%               |
| GSE25055-GPL96(205470_s_at)                                  | -0.11 | 0.0783 | 0.89 | [0.77; 1.04]      | 0.0%              | 0.0%               |
| GSE1456-GPL96(205470_s_at)                                   | -0.16 | 0.1869 | 0.85 | [0.59; 1.23]      | 0.0%              | 0.0%               |
| GSE22210-GPL9183(KLK11_P103_R)                               | -0.17 | 0.5654 | 0.84 | [0.28; 2.55]      | 0.0%              | 0.0%               |
| GSE20713-GPL570(205470_s_at)                                 | -0.19 | 0.1688 | 0.83 | [0.60; 1.16]      | 0.0%              | 0.0%               |
| GSE20711-GPL570(205470_s_at)                                 | -0.19 | 0.1688 | 0.83 | [0.60; 1.16]      | 0.0%              | 0.0%               |
| GSE15363-GPL1708(16748)                                      | -0.19 | 0.2531 | 0.83 | [0.50; 1.36]      | 0.0%              | 0.0%               |
| GSE31589-GPL8274(73909)                                      | -0.36 | 0.3544 | 0.70 | [0.35; 1.40]      | 0.0%              | 0.0%               |
| GSE31589-GPL8274(61428)                                      | -0.41 | 0.3706 | 0.67 | [0.32; 1.38]      | 0.0%              | 0.0%               |
| GSE31589-GPL8274(69519)                                      | -0.51 | 0.3706 | 0.60 | [0.29; 1.24]      | 0.0%              | 0.0%               |
| GSE31589-GPL8274(10727)                                      | -0.54 | 0.2721 | 0.58 | [0.34; 0.99]      | 0.0%              | 0.0%               |
| GSE31589-GPL8274(147826)                                     | -0.57 | 0.2636 | 0.57 | [0.34; 0.95]      | 0.0%              | 0.0%               |
| GSE31589-GPL8274(152245)                                     | -0.60 | 0.2930 | 0.55 | [0.31; 0.97]      | 0.0%              | 0.0%               |
| GSE31589-GPL8269(158188)                                     | -0.60 | 0.4319 | 0.55 | [0.23; 1.28]      | 0.0%              | 0.0%               |
| GSE31589-GPL8269(96520)                                      | -0.62 | 0.3890 | 0.54 | [0.25; 1.15]      | 0.0%              | 0.0%               |
| GSE31589-GPL8264(75703)                                      | -0.63 | 0.7229 | 0.54 | [0.13; 2.21]      | 0.0%              | 0.0%               |
| GSE31589-GPL8274(205035)                                     | -0.65 | 0.3232 | 0.52 | [0.28; 0.99]      | 0.0%              | 0.0%               |
| GSE31589-GPL8264(242078)                                     | -0.67 | 0.8793 | 0.51 | [0.09; 2.87]      | 0.0%              | 0.0%               |
| GSE31589-GPL8269(109408)                                     | -0.67 | 0.3805 | 0.51 | [0.24; 1.07]      | 0.0%              | 0.0%               |
| GSE31589-GPL8264(103518)                                     | -0.68 | 0.7366 | 0.51 | [0.12; 2.15]      | 0.0%              | 0.0%               |
| GSE31589-GPL8274(229079)                                     | -0.70 | 0.3270 | 0.50 | [0.26; 0.94]      | 0.0%              | 0.0%               |
| GSE31589-GPL8264(136213)                                     | -0.71 | 0.7731 | 0.49 | [0.11; 2.24]      | 0.0%              | 0.0%               |
| GSE31589-GPL8269(80193)                                      | -0.72 | 0.4055 | 0.49 | [0.22; 1.08]      | 0.0%              | 0.0%               |
| GSE31589-GPL8264(92683)                                      | -0.74 | 0.8794 | 0.48 | [0.08; 2.67]      | 0.0%              | 0.0%               |
| GSE31589-GPL8269(148819)                                     | -0.87 | 0.3975 | 0.42 | [0.19; 0.91]      | 0.0%              | 0.0%               |
| GSE31589-GPL8264(162479)                                     | -0.89 | 1.0323 | 0.41 | [0.05; 3.12]      | 0.0%              | 0.0%               |
| GSE31589-GPL8269(35364)                                      | -0.93 | 0.4265 | 0.39 | [0.17; 0.91]      | 0.0%              | 0.0%               |
| GSE31589-GPL8264(184181)                                     | -1.06 | 1.1167 | 0.35 | [0.04; 3.09]      | 0.0%              | 0.0%               |
| GSE31589-GPL8264(164579)                                     | -1.10 | 1.1418 | 0.33 | [0.04; 3.11]      | 0.0%              | 0.0%               |
| GSE22210-GPL9183(KLK11_P1290_F)                              | -1.77 | 1.5229 | 0.17 | [0.01; 3.38]      | 0.0%              | 0.0%               |
| Fixed effect model                                           |       |        |      | 1.00 [1.00; 1.00] | 100.0%            | --                 |
| Random effects model                                         |       |        |      | 1.00 [1.00; 1.00] | --                | 100.0%             |
| Heterogeneity: $I^2 = 31\%$ , $\tau^2 < 0.0001$ , $p = 0.03$ |       |        |      |                   |                   |                    |

**Figure S3.** Forest plot of the impact of KLK11 expression on the hazard ratio of overall survival in breast cancer. Depicted are several publicly available datasets. The analysis was performed via the GENT2 platform.

**Table S1.** Multivariate Cox regression analysis of clinical patient outcome in triple-negative breast cancer for clinicopathological parameters (including chemotherapy) and tumor biological factors.

| Clinicopathological parameters | DFS             |                          |              | OS              |                          |              |
|--------------------------------|-----------------|--------------------------|--------------|-----------------|--------------------------|--------------|
|                                | No <sup>a</sup> | HR (95% CI) <sup>b</sup> | p            | No <sup>a</sup> | HR (95% CI) <sup>b</sup> | p            |
| <b>Age</b>                     |                 |                          | <b>0.186</b> |                 |                          | <b>0.030</b> |
| ≤ 60 years                     | 57              | 1                        |              | 57              | 1                        |              |
| > 60 years                     | 41              | 1.61 (0.80-3.24)         |              | 43              | 2.36 (1.09-5.112)        |              |
| <b>Lymph node status</b>       |                 |                          | <b>0.118</b> |                 |                          | <b>0.245</b> |
| N0                             | 53              | 1                        |              | 55              | 1                        |              |
| N <sup>+</sup>                 | 45              | 1.71 (0.87-3.34)         |              | 45              | 1.51 (0.75-3.04)         |              |
| <b>Tumor Size</b>              |                 |                          | <b>0.419</b> |                 |                          | <b>0.590</b> |
| ≤20 mm                         | 28              | 1                        |              | 29              | 1                        |              |
| >20 mm                         | 70              | 1.39 (0.63-3.06)         |              | 71              | 1.27 (0.54-2.98)         |              |
| <b>Chemotherapy</b>            |                 |                          | <b>0.003</b> |                 |                          | <b>0.016</b> |
| no                             | 19              | 1                        |              | 20              | 1                        |              |
| yes                            | 79              | 0.31 (0.144-0.66)        |              | 80              | 0.39 (0.18-0.84)         |              |
| <b>KLK10 mRNA<sup>c</sup></b>  |                 |                          | <b>0.045</b> |                 |                          | <b>0.147</b> |
| low                            | 64              | 1                        |              | 66              | 1                        |              |
| high                           | 34              | 1.94 (1.01-3.71)         |              | 34              | 1.69 (0.83-3.43)         |              |
| <b>KLK11 mRNA<sup>c</sup></b>  |                 |                          | <b>0.253</b> |                 |                          | <b>0.108</b> |
| low                            | 51              | 1                        |              | 53              | 1                        |              |
| high                           | 47              | 1.47 (0.76-2.87)         |              | 47              | 1.81 (0.88-3.74)         |              |

Chi-square test, significant p-values (p < 0.05) are indicated in bold.

<sup>a</sup> Number of patients.

<sup>b</sup> HR: hazard ratio (CI: confidence interval) of univariate Cox regression analysis.

<sup>c</sup> dichotomized into low and high levels by the 50<sup>th</sup> percentile for KLK11 and the 67<sup>th</sup> percentile for KLK10.

<sup>d</sup> dichotomized into low levels by KLK10 low and KLK11 low and high levels by KLK10 high and/or KLK11 high.
